# Supplementary material for: Spatial and Temporal Variation in Reproduction of a Generalist Crocodilian, Caiman crocodilus yacare, in a Seasonally Flooded Wetland
Source: PubMed Central journal article supplement (PMC4481102; doi:10.1371/journal.pone.0129368), 2015-06-24
Supplement: pone.0129368.s001.pdf [file pone.0129368.s001.pdf]

**S1 Table. List of variables, annual rainfall, maximum water level, minimum temperature (°C), number of nests in Nhumirim and Campo Dora Ranch between 1987-2014.**

| <b>Year</b> | <b>Annual Rainfall (mm)</b> | <b>Water Level (cm)</b> | <b>Minimum Temperature (°C)</b> | <b>Nhumirim Nests</b> | <b>Campo Dora Nests</b> |
|-------------|-----------------------------|-------------------------|---------------------------------|-----------------------|-------------------------|
| 1987        | 1353.30                     | 433                     | 17.34                           | 73                    | -                       |
| 1988        | 1282.50                     | 499                     | 17.51                           | 92                    | -                       |
| 1989        | 1548.00                     | 664                     | 16.26                           | 93                    | 32                      |
| 1990        | 1316.10                     | 612                     | 17.48                           | 27                    | 20                      |
| 1991        | 820.3                       | 450                     | 15.14                           | 61                    | -                       |
| 1992        | 1265.80                     | 549                     | 16.21                           | 67                    | -                       |
| 1993        | 1416.00                     | 538                     | 16.20                           | 22                    | 18                      |
| 1994        | 828.7                       | 516                     | 14.70                           | 18                    | -                       |
| 1995        | 10004.30                    | 394                     | 15.39                           | 96                    | 58                      |
| 1996        | 1213.20                     | 656                     | 16.24                           | 71                    | 41                      |
| 1997        | 1229.60                     | 510                     | 16.96                           | 96                    | 33                      |
| 1998        | 1001.70                     | 569                     | 16.91                           | 78                    | 74                      |
| 1999        | 1400.20                     | 464                     | 16.90                           | 41                    | 62                      |
| 2000        | 778.1                       | 460                     | 15.23                           | 88                    | 52                      |
| 2001        | 1428.20                     | 466                     | 16.33                           | 48                    | -                       |
| 2002        | 1202.50                     | 315                     | 16.08                           | 2                     | -                       |
| 2003        | 675.7                       | 511                     | 17.28                           | 0                     | -                       |
| 2004        | 991.8                       | 518                     | 13.93                           | 7                     | 63                      |
| 2005        | 1243.20                     | 426                     | 14.94                           | 32                    | 7                       |
| 2006        | 967.7                       | 329                     | 14.92                           | 55                    | 14                      |
| 2007        | 1156.40                     | 540                     | 14.26                           | 105                   | 63                      |
| 2008        | 978.2                       | 510                     | 13.58                           | 67                    | 37                      |
| 2009        | 1204.60                     | 515                     | 15.63                           | 2                     | 91                      |
| 2010        | 1087.00                     | 330                     | 15.28                           | 0                     | 16                      |
| 2011        | 751.5                       | 436                     | 14.02                           | 16                    | 71                      |
| 2012        | 297.90                      | 562                     | 16.75                           | 1                     | 74                      |
| 2013        | 1030.30                     | 296                     | 15.13                           | 0                     | 33                      |
| 2014        | 846.4                       | 426                     | 14.98                           | 0                     | 0                       |
